# Supplementary material for: Short-Term Alternate Feeding between Terrestrially Sourced Oil- and Fish Oil-Based Diets Modulates the Intestinal Microecology of Juvenile Turbot
Source: MDPI journal article supplement (doi:10.3390/biology12050650), 2023-04-26
Supplement: s1 [file s1]

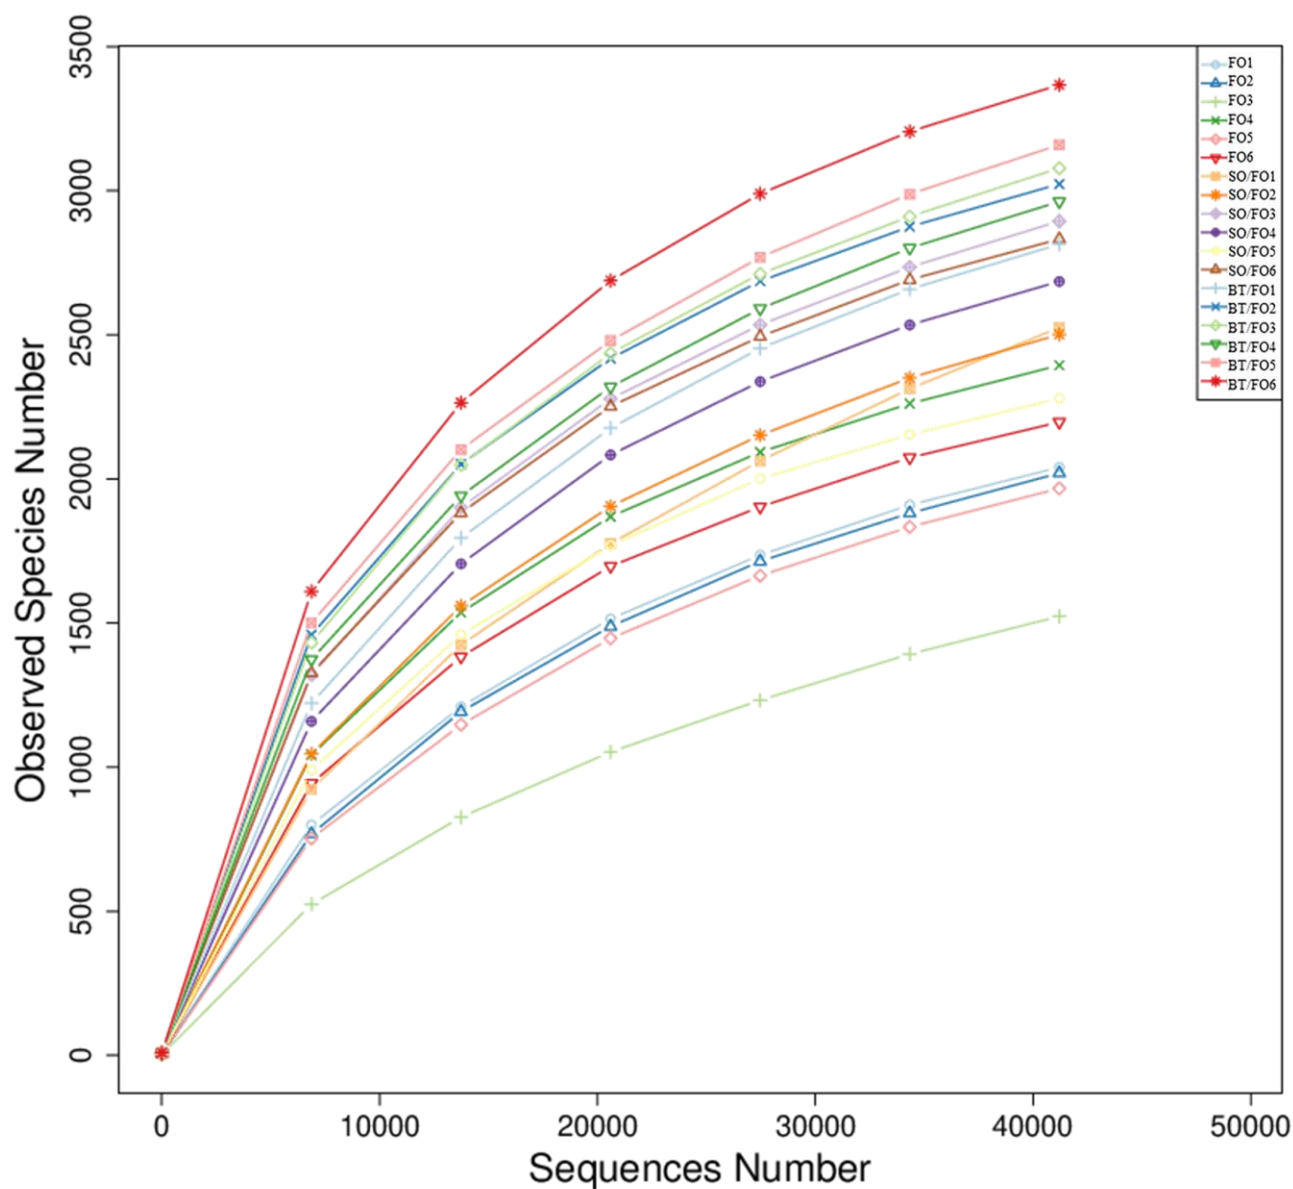

**Figure S1.** Rarefaction curve of intestinal microbiota of juvenile turbot.

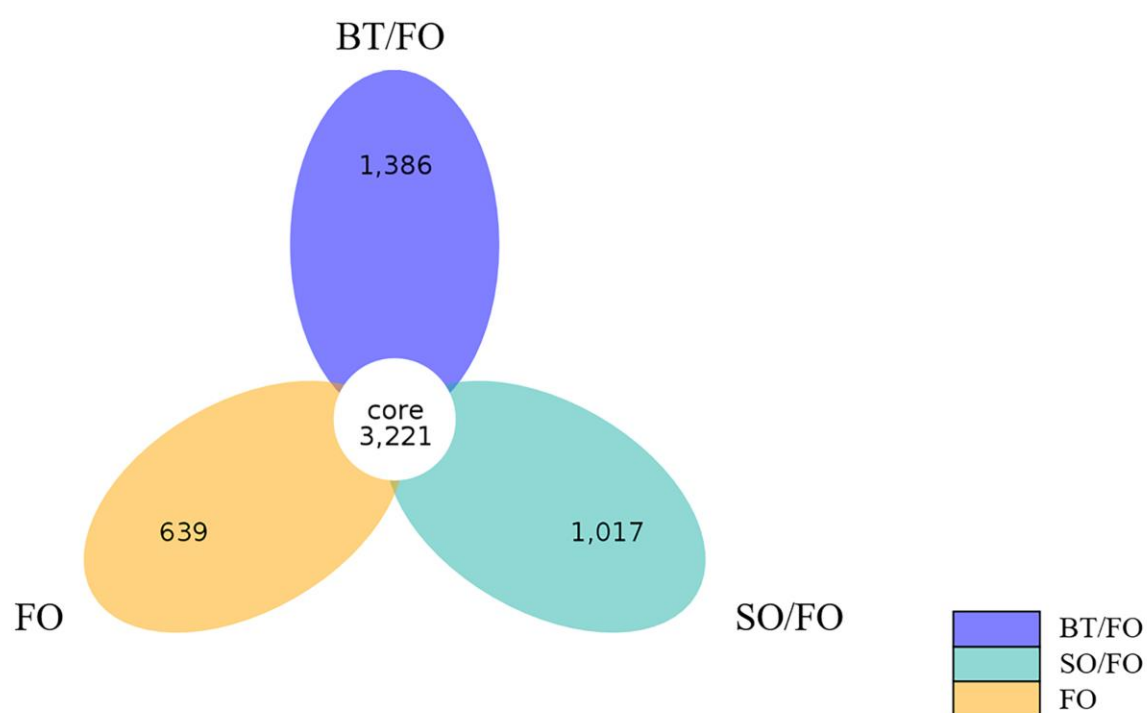

**Figure S2.** Venn diagram of unique and shared OTUs in the intestinal microbiota of turbot under different feeding schedules.
